# Supplementary material for: Dibenzobarrelene-derived Pd-NHCs: efficient precatalysts for the Suzuki–Miyaura polycondensations of dichloroarene monomers
Source: Royal Society of Chemistry journal article supplement (doi:10.1039/d4py01026d), 2024-01-01
Supplement: d4py01026d1.pdf [file d4py01026d1.pdf]

**Dibenzobarrelene-Derived Pd-NHCs: Efficient Precatalysts for the Suzuki-Miyaura Polycondensations of Dichloroarenes Monomers**

Yuman Guo, Hao Wu, Meng-Jiao Zhang, Feng-Shou Liu\*

*School of Chemistry and Chemical Engineering, Guangdong Cosmetics Engineering and Technology Research Center, Guangdong, Pharmaceutical University, Zhongshan, Guangdong 528458, China*

Content of Supporting Information

|                                                                                 |     |
|---------------------------------------------------------------------------------|-----|
| 1. Physical Measurements.....                                                   | S2  |
| 2. Experimental Procedure: General Procedure for the Synthesis of Pd-NHCs ..... | S3  |
| 3. NMR spectra for the products.....                                            | S7  |
| 4. Single-crystal data for NHC-Pd catalysts .....                               | S19 |
| 5. References.....                                                              | S22 |

## 1. Physical Measurements

NMR spectra were acquired on a Bruker DMX 400 MHz instrument at ambient temperature, using TMS as an internal standard and CDCl<sub>3</sub> as the solvent. Single-crystal X-ray diffraction data were collected using the  $\omega$ -2 $\theta$  scan mode on a Bruker SMART 1000 CCD diffractometer with graphite-monochromated Mo K $\alpha$  radiation ( $\lambda = 0.71073$  Å) at 173 K for compounds **C2**, **C4** and **C5**. Cell parameters were refined globally based on the positions of all collected reflections. Intensities were corrected for Lorentz and polarization effects, as well as empirical absorption. Structures were solved by direct methods and refined using full-matrix least squares on F<sup>2</sup>. Hydrogen atoms were placed in calculated positions. Structure solution and refinement were performed using the SHELXL-97 software package. All non-hydrogen atoms were refined anisotropically, with hydrogen atoms introduced in calculated positions and displacement factors matching those of the host carbon atoms. GPC analyses of the molecular weights and molecular weight distributions (PDI = Mw/Mn) of the polymers were performed on a Waters Breeze 2 GPC chromatograph equipped with a differential refractive-index detector. Tetrahydrofuran (THF) used as the eluent at a flow rate of 1.0 mL/min.

## 2. Experimental Procedure: General Procedure for the Synthesis of Pd-NHCs

The carbene imidazolium salt of **L** and Pd-NHCs of **C1** were synthesized according to our previous reports.<sup>1</sup>

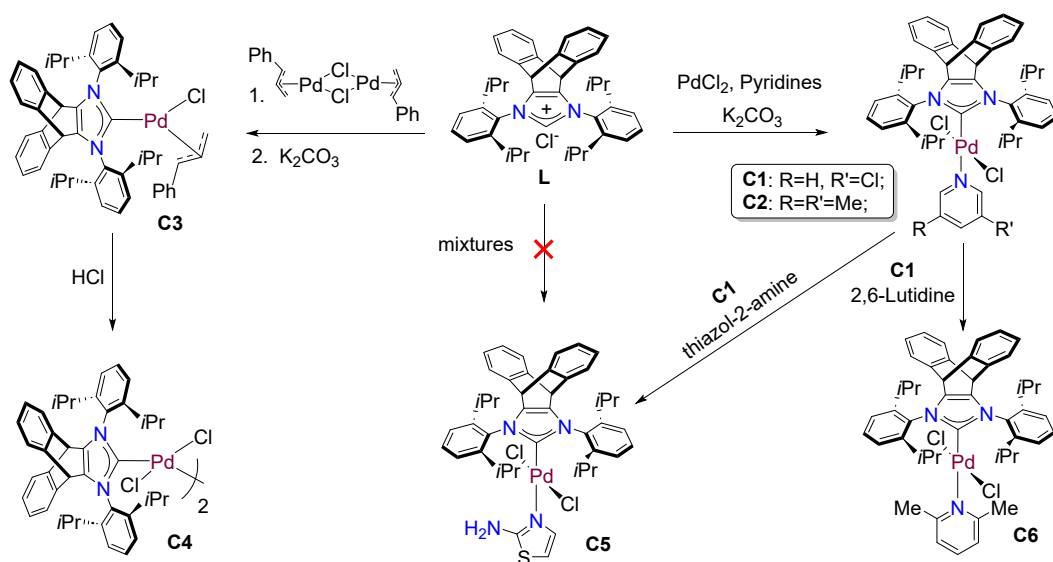

### 2.1 Synthesis Procedure of Carbene Palladium Catalyst **C2**:

Add imidazolium salt **L1** (1 mmol), palladium chloride (1.1 mmol),  $\text{K}_2\text{CO}_3$  (10 mmol), and 3,5-dimethylpyridine to a 100 mL flask. Stir the mixture at  $60^\circ\text{C}$  for 6 hours. After cooling, add dichloromethane (20 mL) to the mixture. Purify the reaction mixture using a short silica gel column with a significant amount of dichloromethane. Distill the filtrate to obtain a yellow solid. Slowly dissolve the yellow solid in a small amount of dichloromethane (approximately 0.5 mL), then add n-hexane to generate a large amount of light yellow powder with a yield of 73%.  $^1\text{H}$  NMR (400 MHz,  $\text{CDCl}_3$ )  $\delta$  7.97 (d,  $J = 2.0$  Hz, 2H), 7.57 (t,  $J = 7.7$  Hz, 2H), 7.42 (d,  $J = 7.8$  Hz, 4H), 7.21 (dd,  $J = 5.3, 3.2$  Hz, 4H), 7.08 (s, 1H), 6.89 (dd,  $J = 5.4, 3.1$  Hz, 4H), 5.15 (s, 2H), 2.88 (p,  $J = 6.7$  Hz, 4H), 2.08 (s, 6H), 1.39 (d,  $J = 6.5$  Hz, 12H), 1.01 (d,  $J = 6.8$  Hz, 12H).  $^{13}\text{C}$  NMR (101 MHz,

CDCl<sub>3</sub>)  $\delta$  152.89, 148.59, 147.95, 146.05, 144.59, 138.54, 133.06, 132.82, 130.27, 124.87, 124.30, 124.21, 47.33, 28.28, 27.06, 23.97, 18.13. HRMS (ESI)  $m/z$ : [M-Cl]<sup>+</sup> calcd for C<sub>48</sub>H<sub>53</sub>ClN<sub>3</sub>Pd, 812.2963; found, 812.2960.

## 2.2 The process of formation of carbene palladium catalyst C3:

To a 100 mL flask was added imidazolium salt **L1** (1 mmol), palladium chloride (1.1 mmol), K<sub>2</sub>CO<sub>3</sub> (10 mmol), and Bis[cinnamyl palladium(II) chloride], and the mixture was stirred at 60 °C for 6 h. Then the mixture was cooled and dichloromethane (20 mL) was added. The reaction mixture was washed by short silica gel column containing a large amount of dichloromethane. The filtrate was distilled to give a yellow solid. The yellow solid was slowly treated with a small amount of dichloromethane until it was completely dissolved (about 0.5 mL), then, hexane was added to produce a yellow powder in 43% yield. <sup>1</sup>H NMR (400 MHz, CDCl<sub>3</sub>)  $\delta$  7.51 (t,  $J$  = 7.7 Hz, -1H), 7.33 (d,  $J$  = 7.7 Hz, -3H), 7.22 (dd,  $J$  = 5.4, 3.2 Hz, -4H), 7.13 – 7.08 (m, -4H), 6.91 (dd,  $J$  = 5.5, 3.2 Hz, -4H), 5.11 (s, -1H), 5.02 – 4.87 (m, -1H), 4.21 (d,  $J$  = 12.6 Hz, -1H), 2.78 (p,  $J$  = 6.8 Hz, -3H), 1.26 – 1.22 (m, -11H), 1.01 (d,  $J$  = 6.8 Hz, -13H). <sup>13</sup>C NMR (101 MHz, CDCl<sub>3</sub>)  $\delta$  181.31, 146.81, 146.14, 144.53, 138.08, 134.11, 129.96, 128.18, 127.50, 126.61, 124.99, 124.94, 124.13, 124.01, 123.88, 108.47, 89.94, 48.05, 47.56, 29.74, 28.09, 25.95, 23.44, 14.18.

## 2.3 Synthesis Procedure of Carbene Palladium Catalyst C4:

Dissolve **C3** (0.5 mmol) in 1,4-dioxane (2 mL) and hydrochloric acid (1 mL) at room temperature for 12 hours. Dilute the mixture with water and filter it. After removing

the solvent from the mixture, dissolve the remaining solid in dichloromethane. Then, add n-hexane to obtain a yellow powder with a yield of 54%.  $^1\text{H}$  NMR (400 MHz,  $\text{CDCl}_3$ )  $\delta$  8.45 (d,  $J = 2.3$  Hz, 2H), 8.38 (dd,  $J = 5.5, 1.4$  Hz, 2H), 7.57 (t,  $J = 7.7$  Hz, 4H), 7.48 (ddd,  $J = 8.2, 2.4, 1.3$  Hz, 2H), 7.41 (d,  $J = 7.7$  Hz, 8H), 6.99 (dd,  $J = 8.2, 5.6$  Hz, 2H), 6.90 (dd,  $J = 5.4, 3.1$  Hz, 8H), 5.16 (s, 4H), 2.85 (p,  $J = 6.7$  Hz, 8H), 1.38 (d,  $J = 6.5$  Hz, 24H), 1.01 (d,  $J = 6.8$  Hz, 24H).  $^{13}\text{C}$  NMR (101 MHz,  $\text{CDCl}_3$ )  $\delta$  150.36, 150.32, 149.36, 147.91, 145.95, 144.75, 137.22, 132.62, 131.72, 130.41, 124.92, 124.33, 124.26, 124.18, 47.32, 28.29, 27.08, 23.93, 14.12.

#### 2.4 Synthesis Procedure of Carbene Palladium Catalyst C5:

**C1** (0.5 mmol) and 2-aminothiazole (0.7 mmol) were added to dichloromethane (1 mL) and reacted at room temperature for 12 hours. The resulting product was then evaporated to dryness, washed with n-hexane 3 times, and filtered to obtain a pale yellow solid with a yield of 90%.  $^1\text{H}$  NMR (400 MHz,  $\text{CDCl}_3$ )  $\delta$  7.56 (t,  $J = 7.7$  Hz, 2H), 7.41 (d,  $J = 7.7$  Hz, 4H), 7.21 (dd,  $J = 5.4, 3.2$  Hz, 4H), 6.89 (dd,  $J = 5.4, 3.1$  Hz, 4H), 6.76 (d,  $J = 4.0$  Hz, 1H), 6.06 (d,  $J = 4.1$  Hz, 1H), 5.56 (s, 1H), 5.29 (s, 1H), 5.16 (s, 2H), 2.82 (p,  $J = 6.7$  Hz, 4H), 1.35 (d,  $J = 6.5$  Hz, 12H), 1.00 (d,  $J = 6.8$  Hz, 12H).  $^{13}\text{C}$  NMR (101 MHz,  $\text{CDCl}_3$ )  $\delta$  169.00, 152.02, 148.08, 146.02, 144.66, 138.71, 132.79, 130.33, 124.97, 124.36, 124.26, 105.87, 47.38, 28.37, 27.19, 23.90. HRMS (ESI)  $m/z$ :  $[\text{M}-\text{Cl}]^+$  calcd for  $\text{C}_{44}\text{H}_{48}\text{ClN}_4\text{PdS}$ , 805.2323; found, 805.2323.

#### 2.5 Synthesis Procedure of Carbene Palladium Catalyst C6:

Dissolve **C1** (0.5 mmol) and 2,6-dimethylpyridine (0.7 mmol) in dichloromethane (1

mL) and react at room temperature for 12 hours. Then, evaporate the solvent and wash the product with n-hexane 3 times. Filter the mixture to obtain a light yellow solid with a yield of 49%.  $^1\text{H}$  NMR (400 MHz,  $\text{CDCl}_3$ )  $\delta$  7.61 – 7.54 (m, 2H), 7.43 (d,  $J = 7.8$  Hz, 4H), 7.21 (dt,  $J = 7.1, 3.5$  Hz, 5H), 6.90 (dd,  $J = 5.4, 3.1$  Hz, 4H), 6.71 (d,  $J = 7.7$  Hz, 2H), 5.23 (s, 2H), 2.86 (p,  $J = 6.7$  Hz, 4H), 2.47 (s, 6H), 1.35 (d,  $J = 6.5$  Hz, 12H), 1.01 (d,  $J = 6.8$  Hz, 12H).  $^{13}\text{C}$  NMR (101 MHz,  $\text{CDCl}_3$ )  $\delta$  158.77, 155.40, 148.49, 146.10, 144.53, 137.18, 132.98, 130.09, 124.83, 124.41, 123.88, 122.12, 47.59, 28.43, 27.46, 24.77, 23.36.

## 2.6 General Procedure for Palladium-Catalyzed Suzuki-Miyaura Cross-Coupling

### Polymerization:

1 mol% N-heterocyclic carbene palladium catalyst was used, with  $\text{KO}^t\text{Bu}$  (2 mmol) as the base, and a THF/ $\text{H}_2\text{O}$  (3:1) mixture as the solvent. The reaction between the chloroarene and pinacol boronate ester was carried out at  $80^\circ\text{C}$  under nitrogen atmosphere for 12 hours. Post-reaction, the polymer was precipitated and washed using methanol.

### 3. NMR spectra for the products

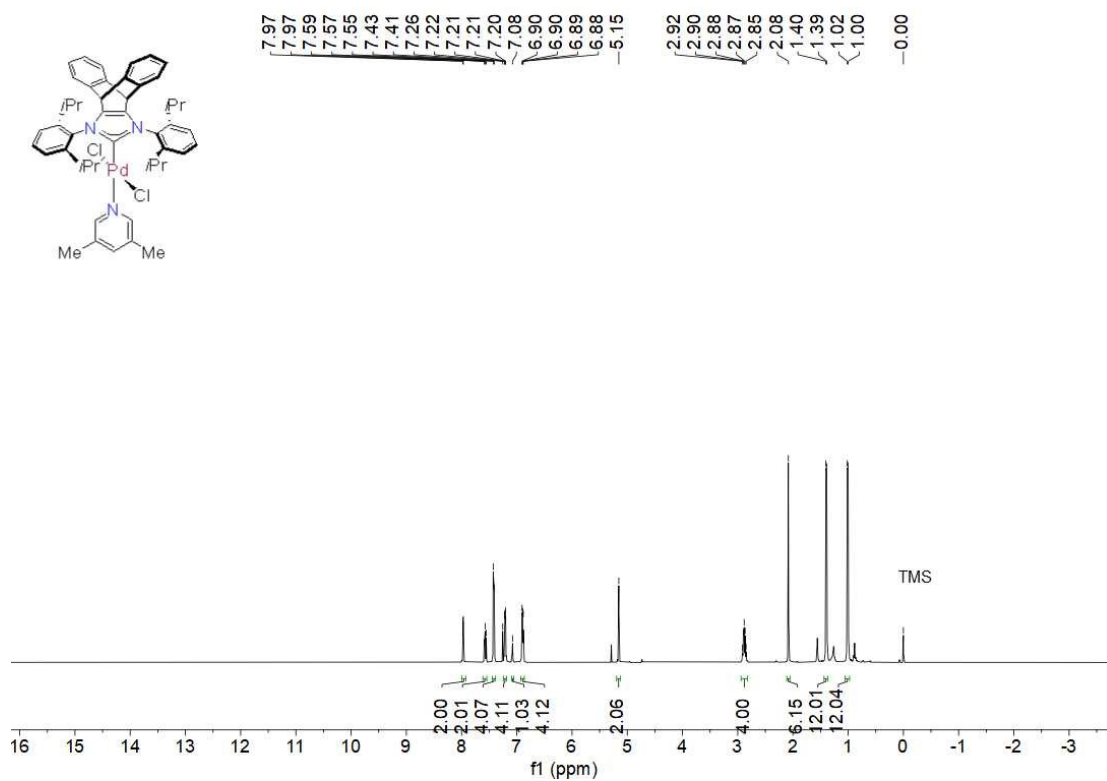

Figure S1. The <sup>1</sup>H NMR spectrums of C2

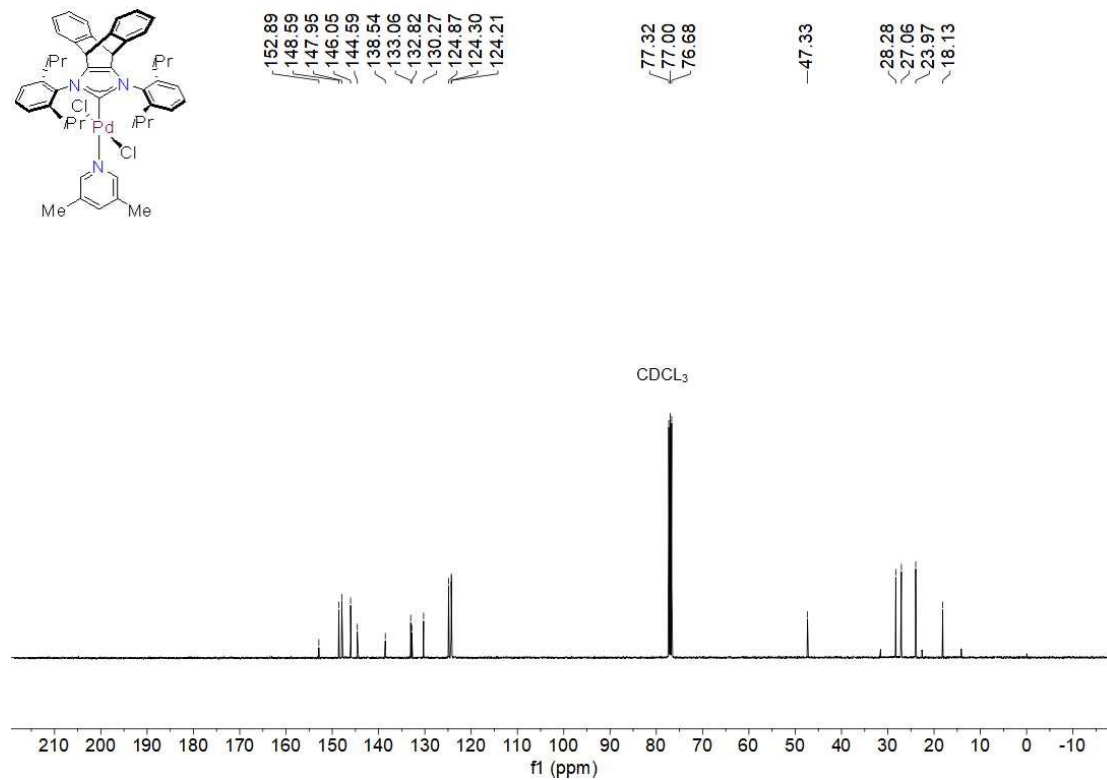

Figure S2. The <sup>13</sup>C NMR spectrums of C2

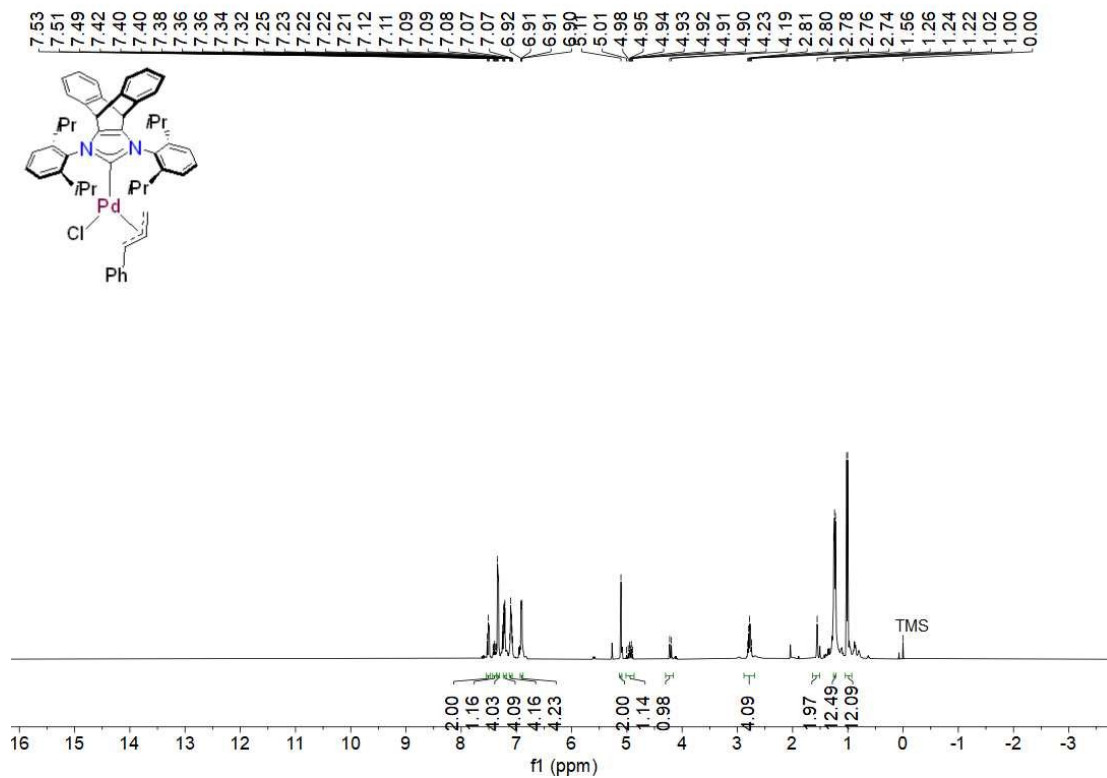

Figure S3. The <sup>1</sup>H NMR spectra of C3

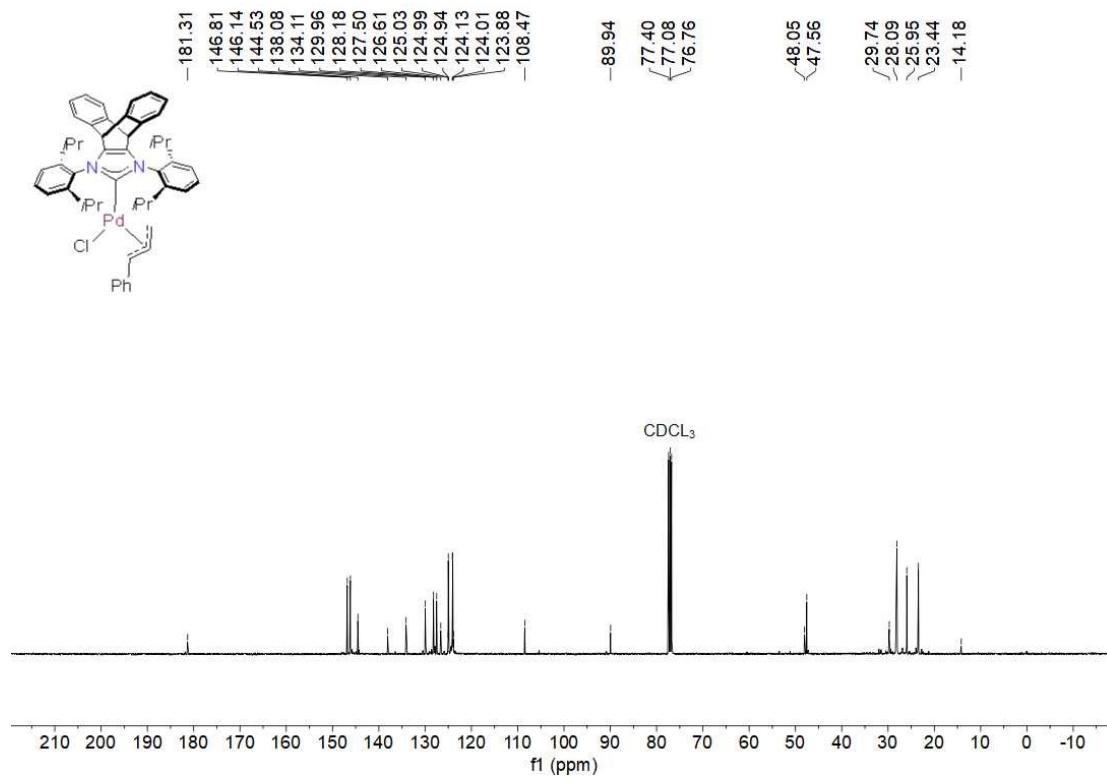

Figure S4. The <sup>13</sup>C NMR spectra of C3



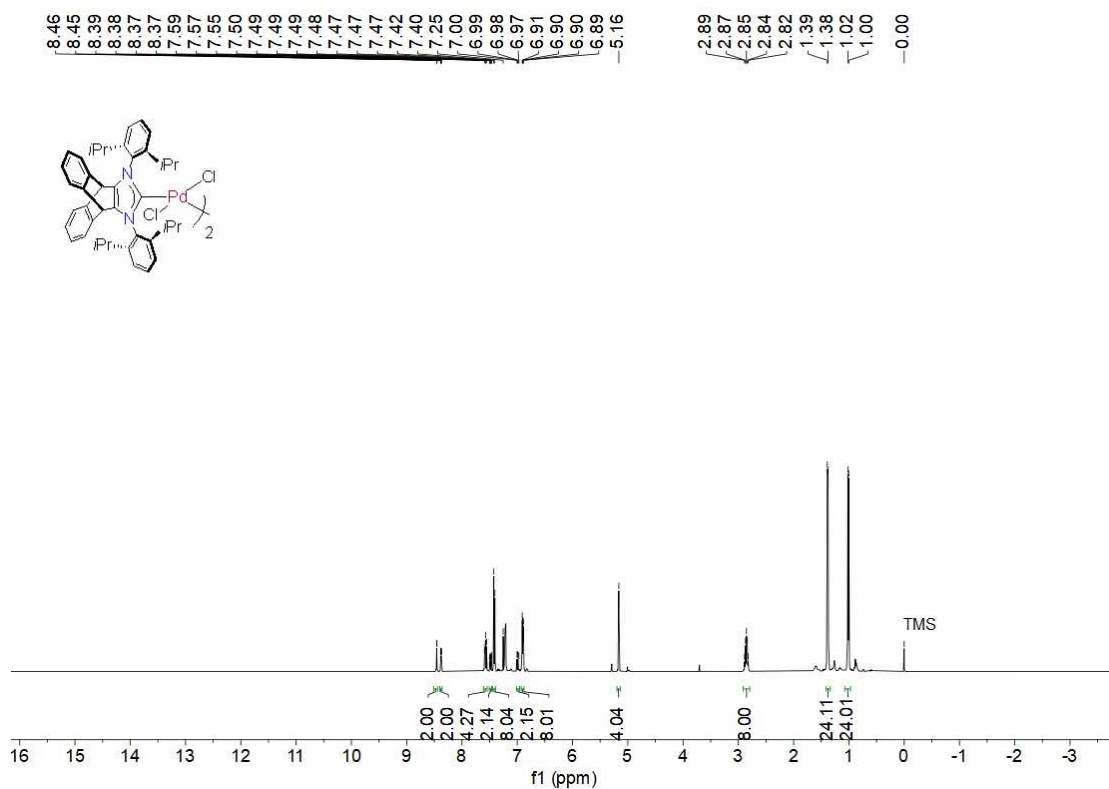

Figure S5. The <sup>1</sup>H NMR spectra of C4

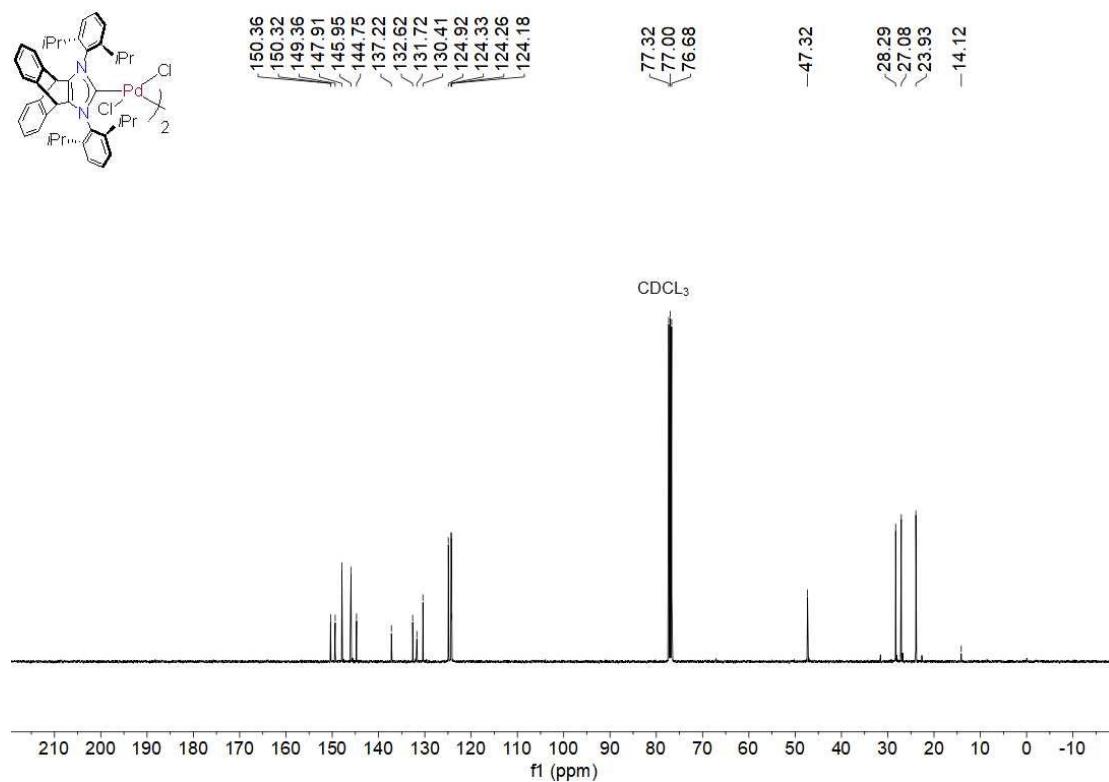

Figure S6. The <sup>13</sup>C NMR spectra of C4

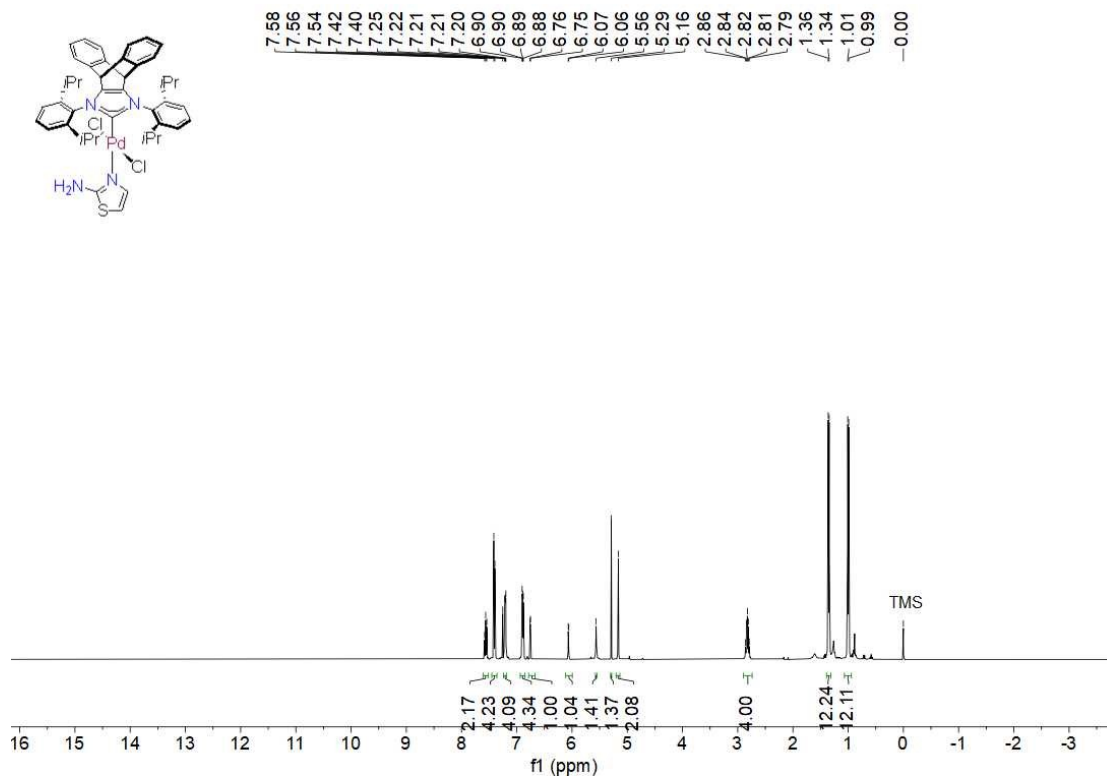

Figure S7. The  $^1\text{H}$  NMR spectra of C5

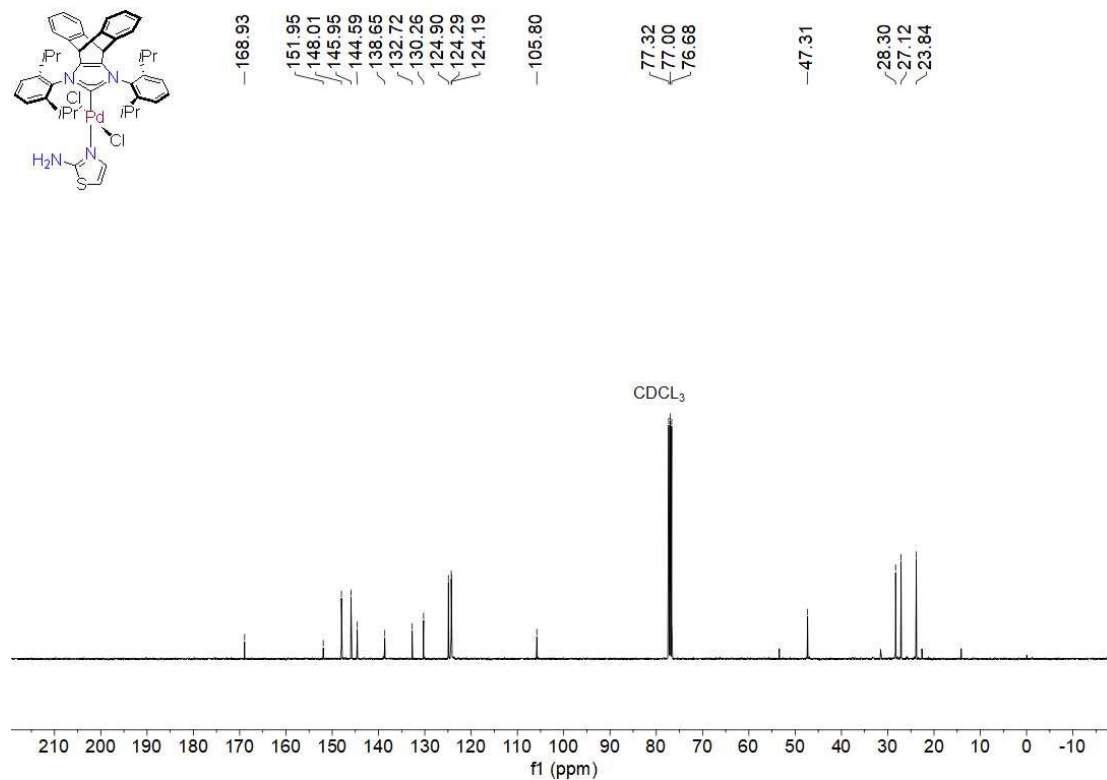

Figure S8. The  $^{13}\text{C}$  NMR spectra of C5

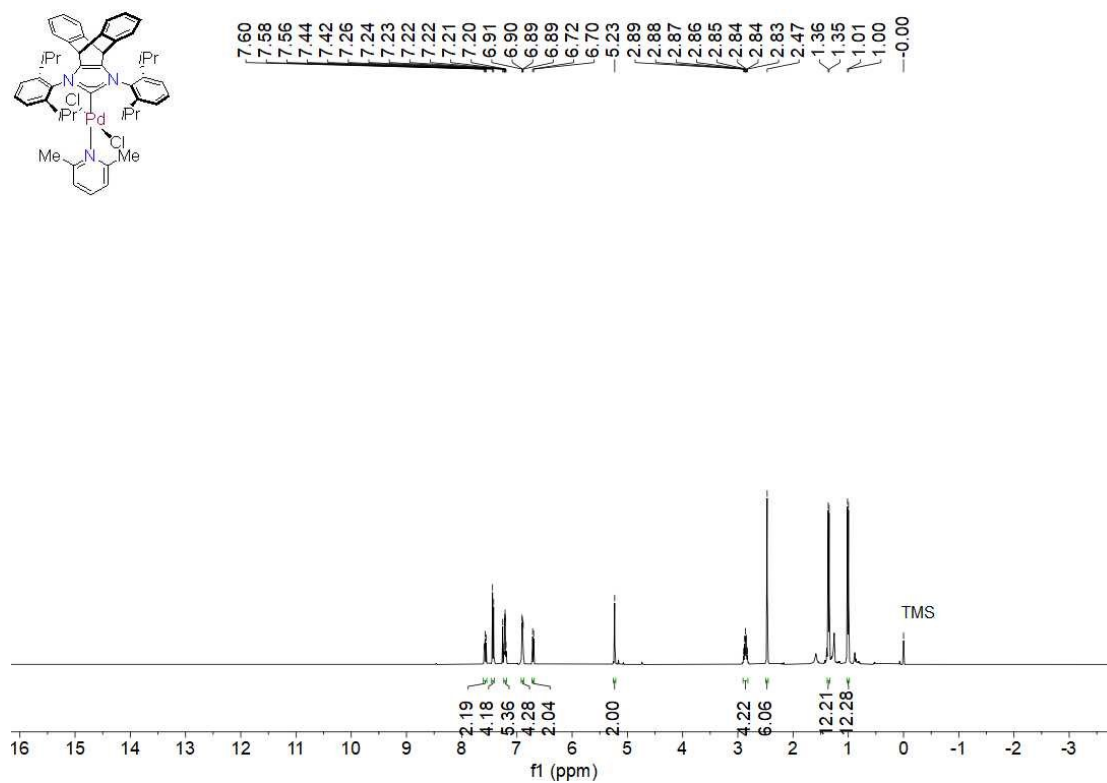

Figure S9. The <sup>1</sup>H NMR spectra of C6

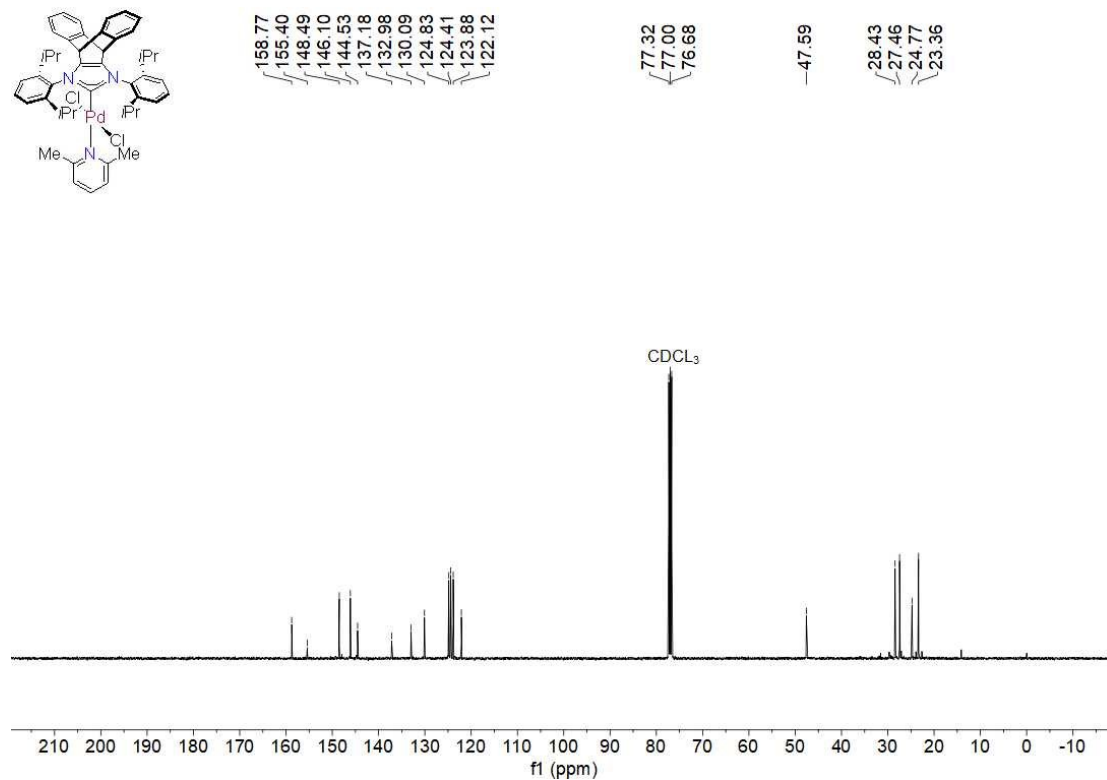

Figure S10. The <sup>13</sup>C NMR spectra of C6

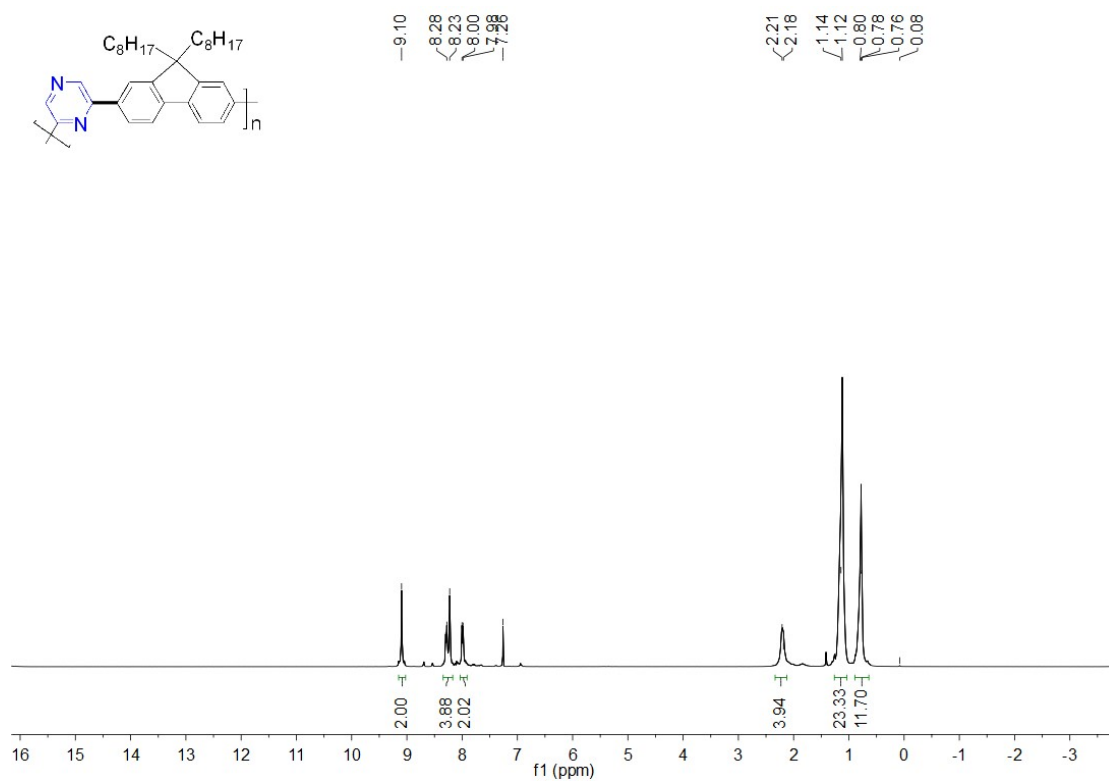

Figure S11. The NMR spectra of P1.

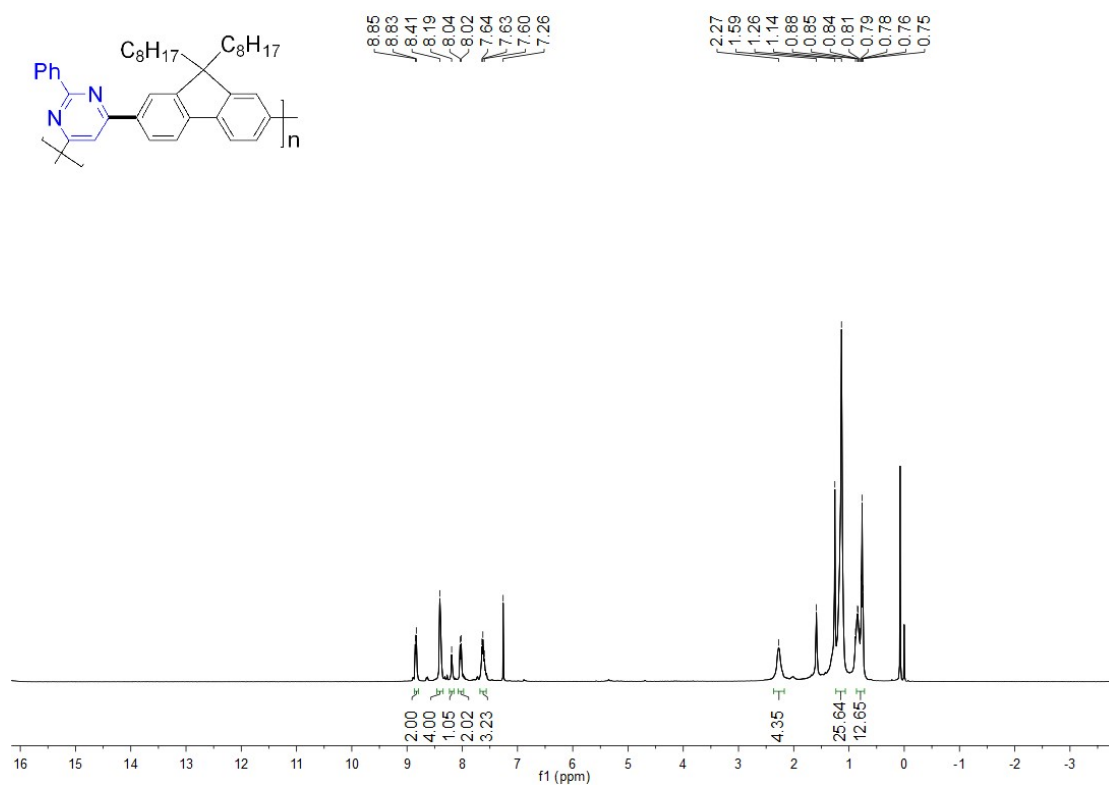

Figure S12. The NMR spectra of P2.

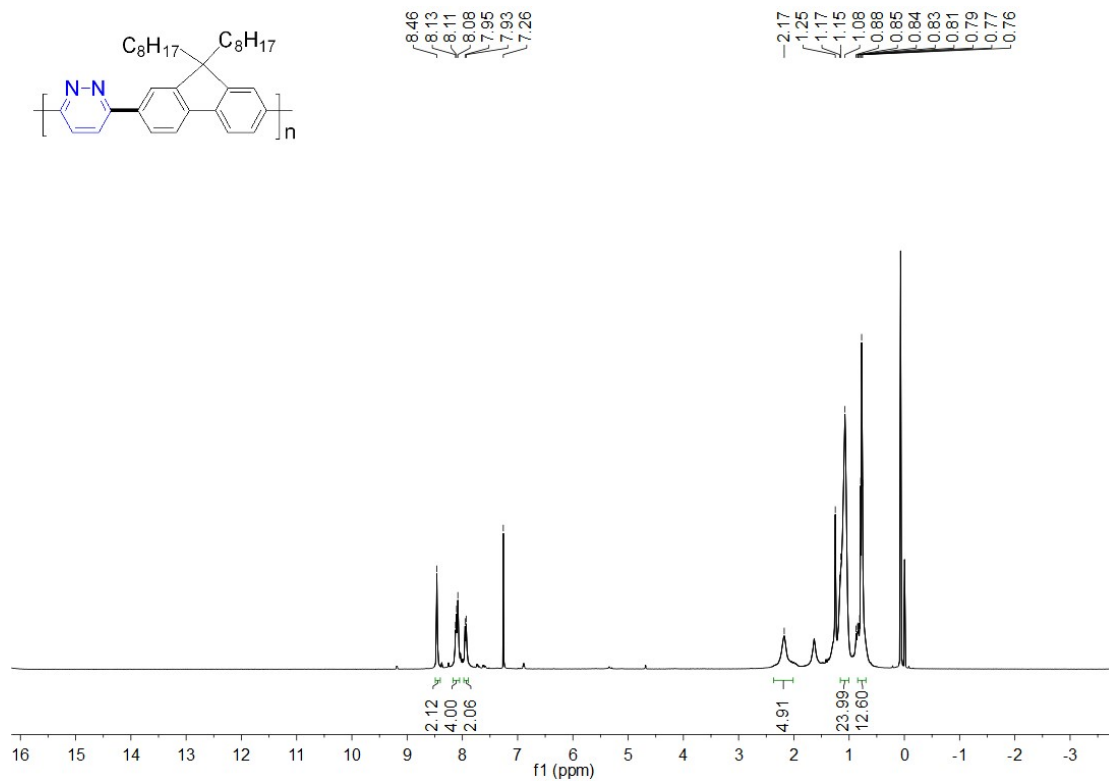

Figure S13. The NMR spectrums of P3.

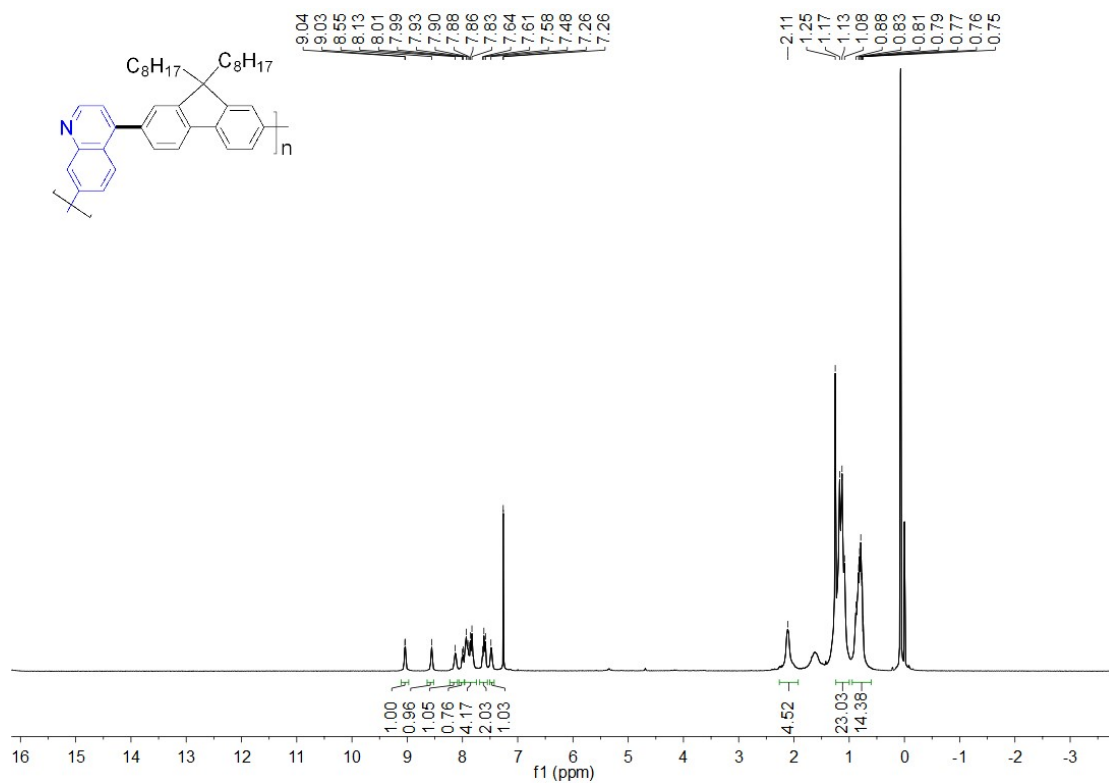

Figure S14. The NMR spectrums of P4.

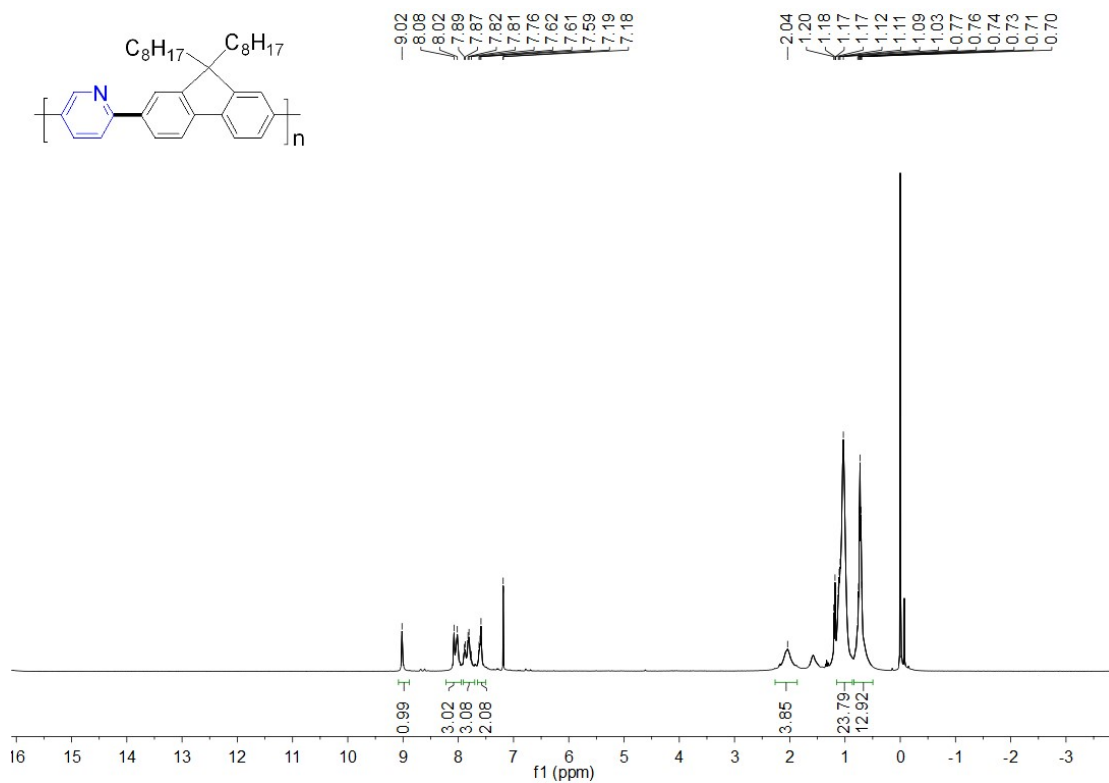

Figure S15. The NMR spectrums of P5.

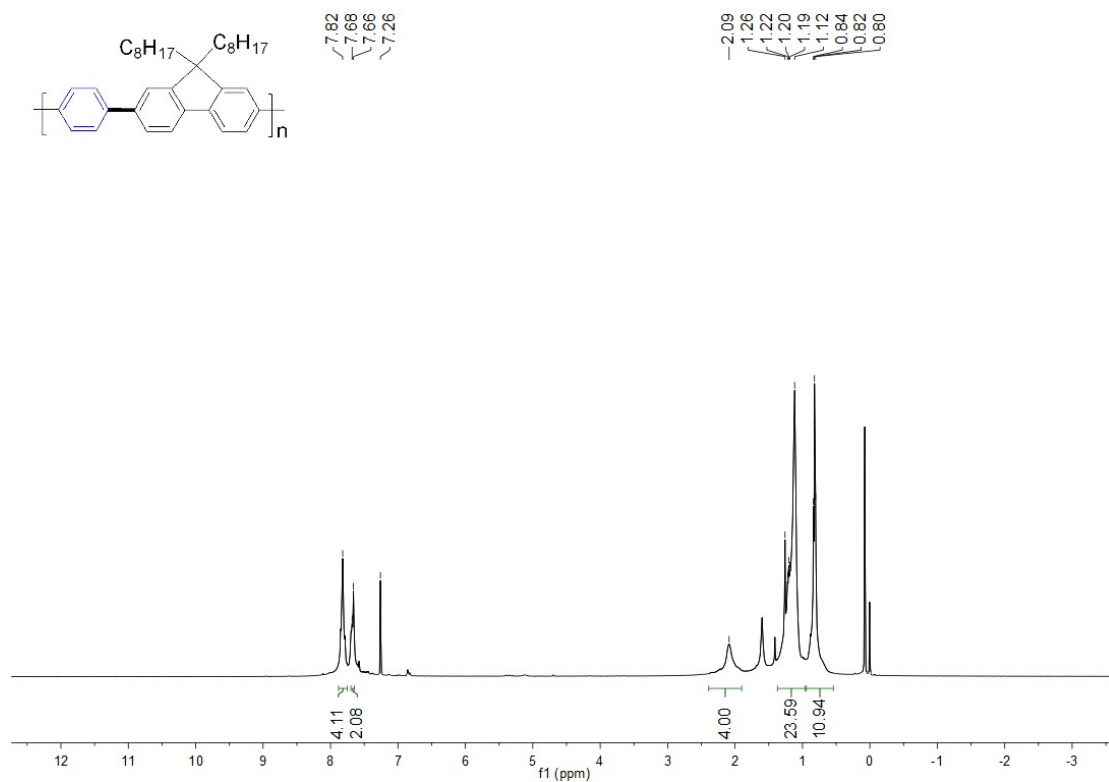

Figure S16. The NMR spectrums of P6.

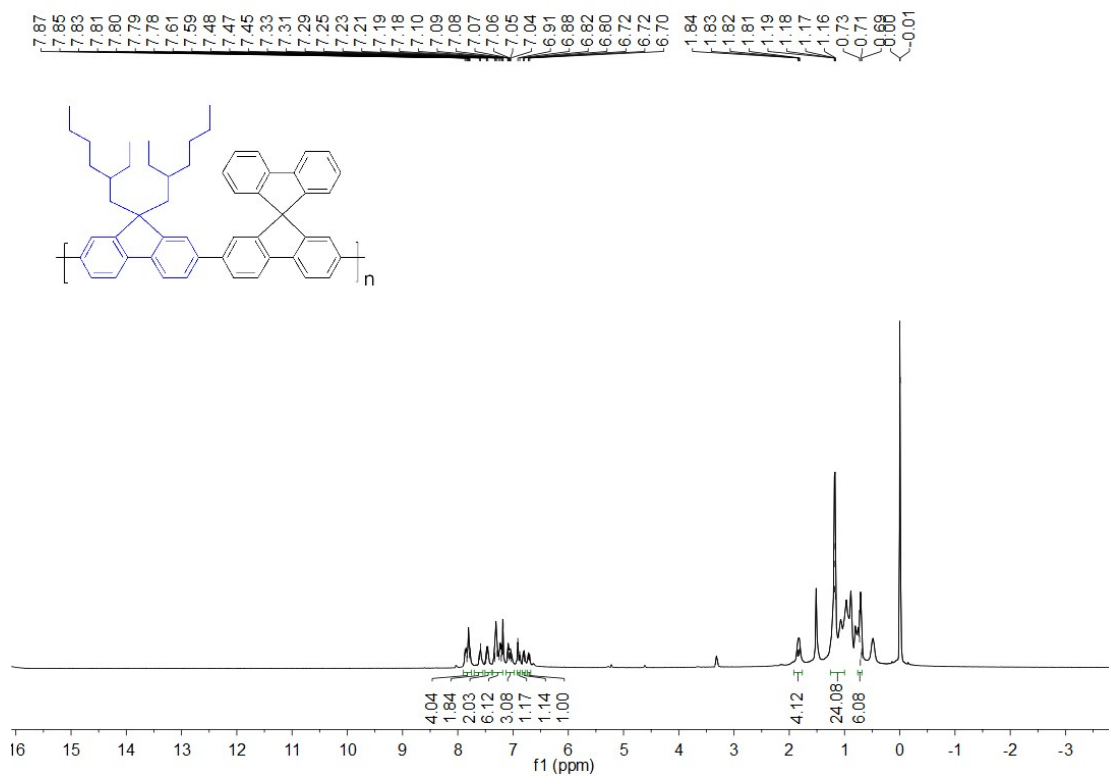

Figure S17. The NMR spectra of P7.

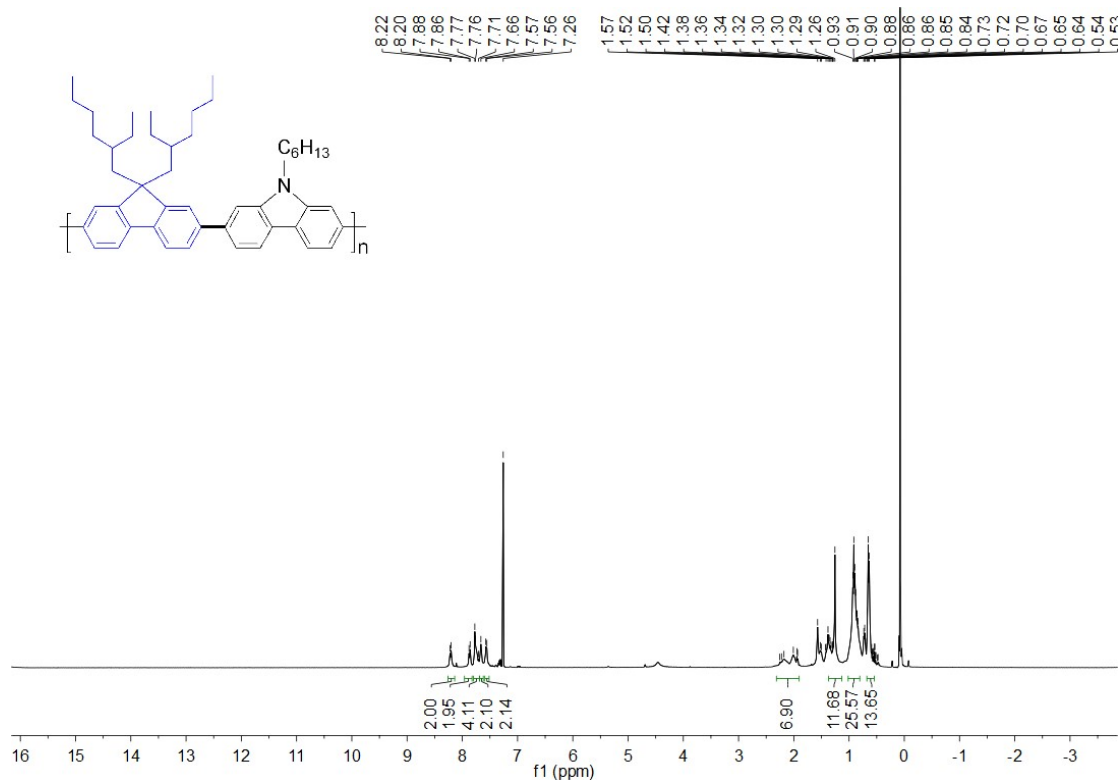

Figure S18. The NMR spectra of P8.

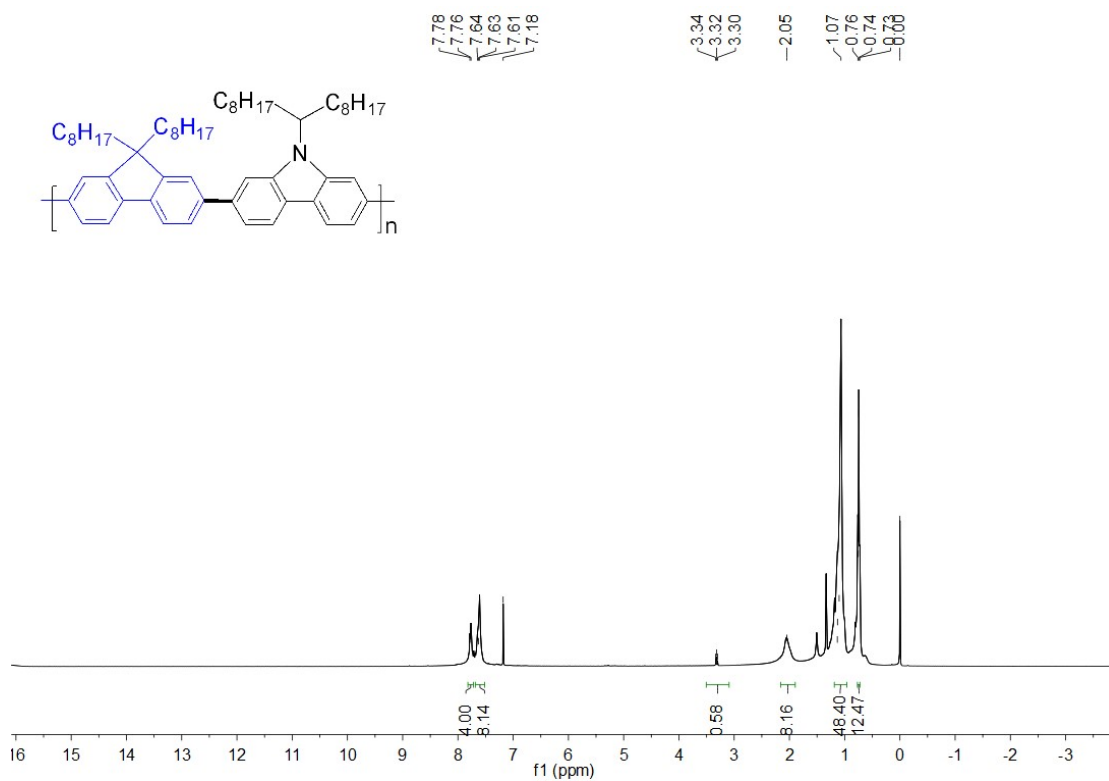

Figure S19. The <sup>1</sup>H NMR spectrum of P9

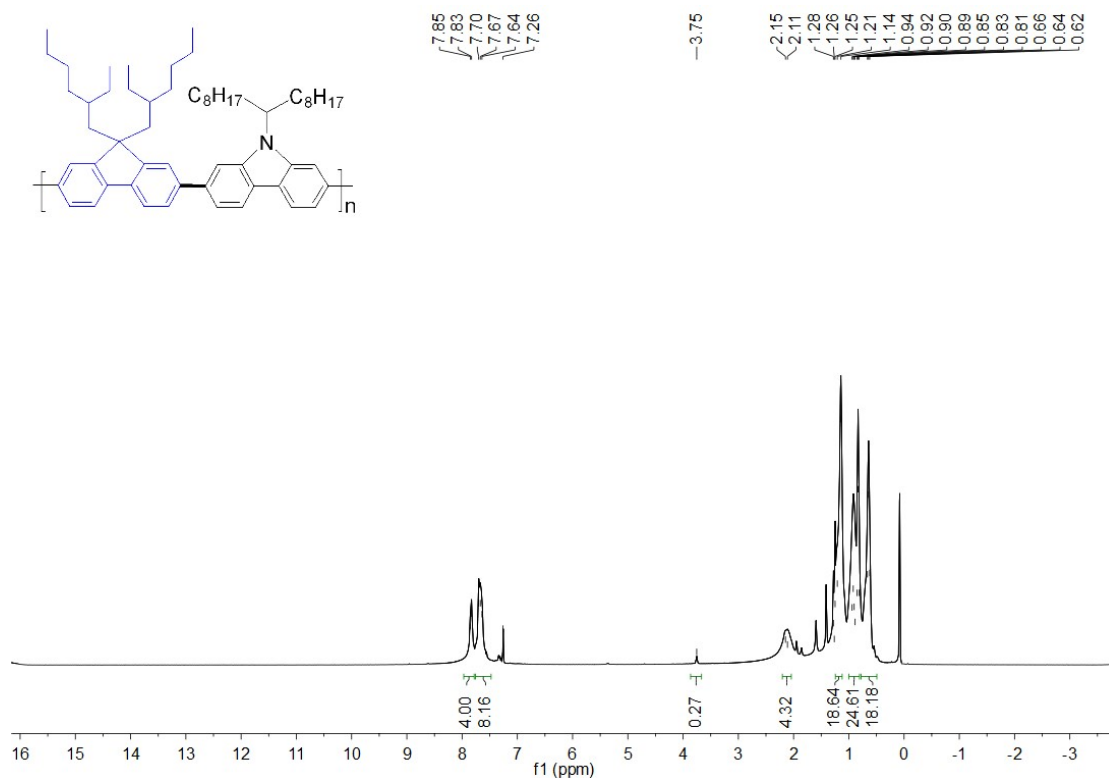

Figure S20. The <sup>1</sup>H NMR spectrum of P10



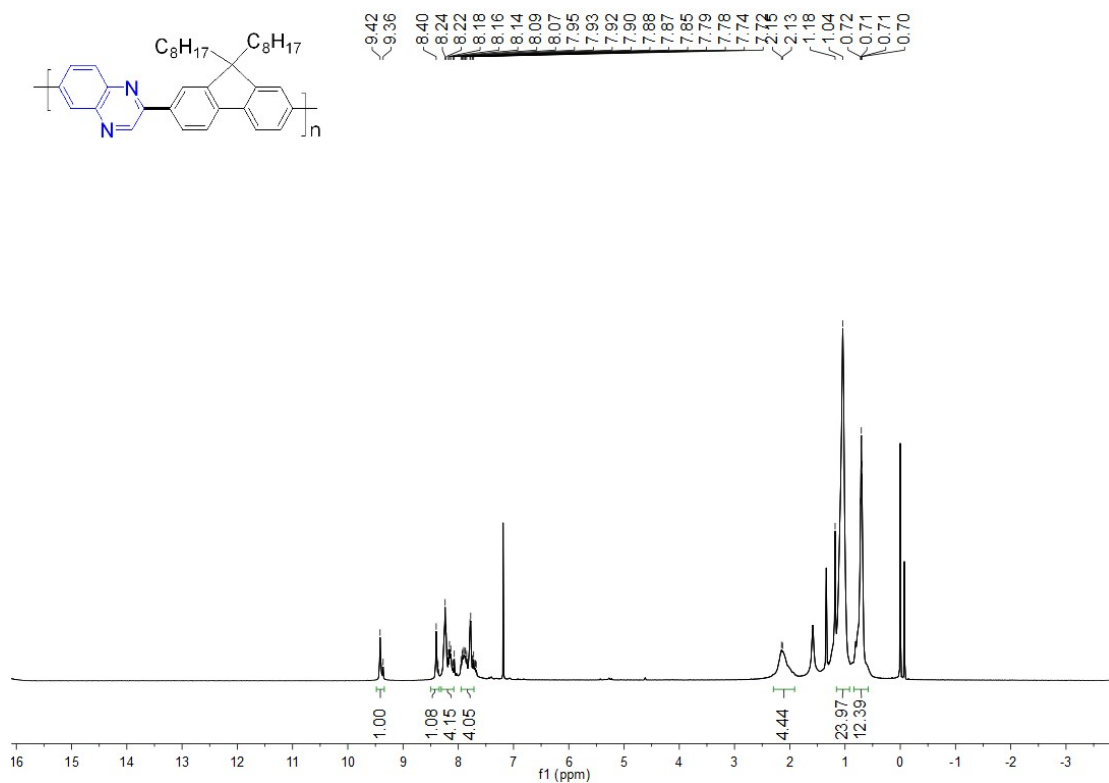

Figure S21. The <sup>1</sup>H NMR spectrum of P11

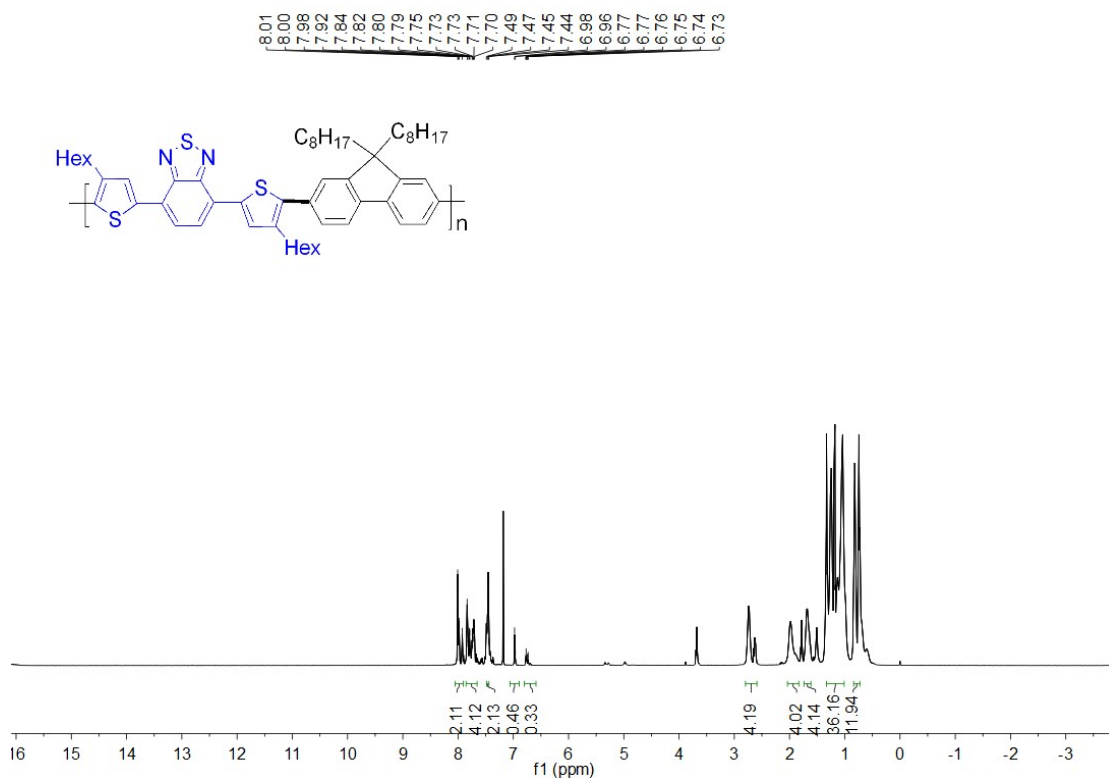

Figure S22. The <sup>1</sup>H NMR spectrum of P12

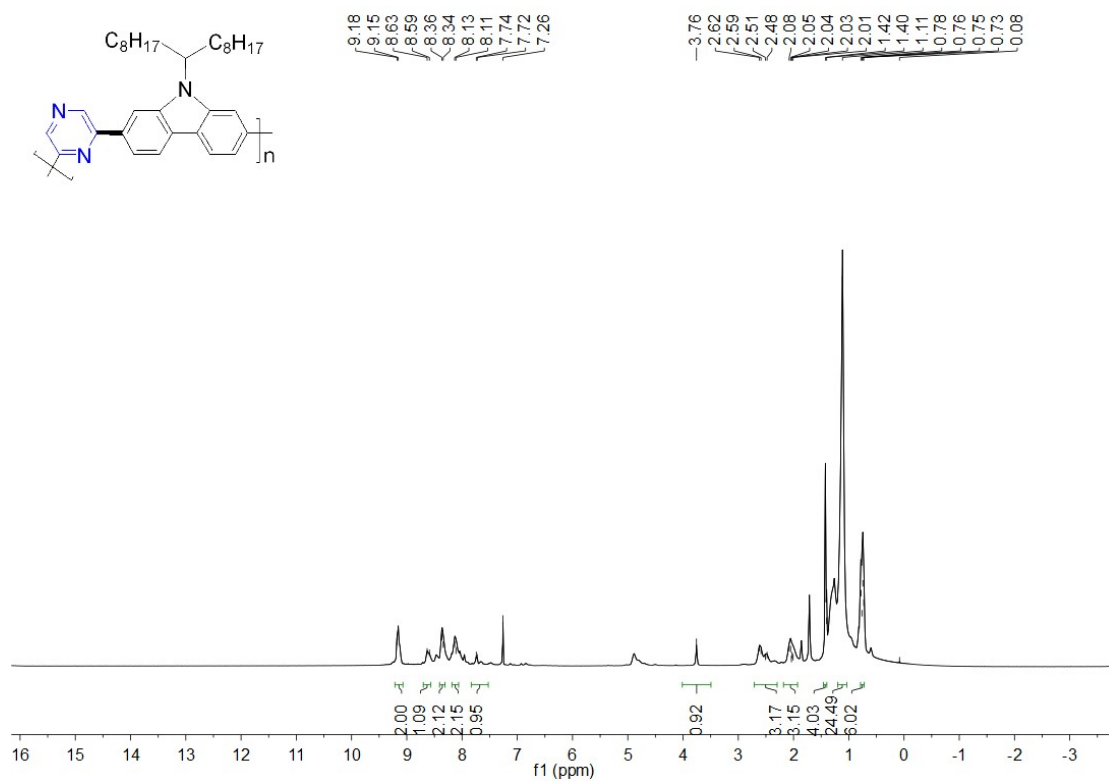

**Figure S23.** The <sup>1</sup>H NMR spectrum of **P13**

#### 4. Single-crystal data for NHC-Pd catalysts

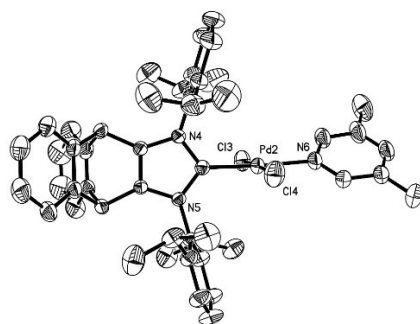

**Table S1. Crystal data and structure refinement for C2.**

|                                             |                                                                   |
|---------------------------------------------|-------------------------------------------------------------------|
| Identification code                         | <b>C2</b>                                                         |
| Empirical formula                           | C <sub>48</sub> H <sub>53</sub> Cl <sub>2</sub> N <sub>3</sub> Pd |
| Formula weight                              | 849.23                                                            |
| Temperature/K                               | 292.98(10)                                                        |
| Crystal system                              | triclinic                                                         |
| Space group                                 | P-1                                                               |
| a/Å                                         | 12.49350(10)                                                      |
| b/Å                                         | 17.71260(10)                                                      |
| c/Å                                         | 22.0093(2)                                                        |
| α/°                                         | 100.5540(10)                                                      |
| β/°                                         | 103.9520(10)                                                      |
| γ/°                                         | 96.6100(10)                                                       |
| Volume/Å <sup>3</sup>                       | 4581.63(7)                                                        |
| Z                                           | 4                                                                 |
| ρ <sub>calc</sub> /cm <sup>3</sup>          | 1.231                                                             |
| μ/mm <sup>-1</sup>                          | 4.588                                                             |
| F(000)                                      | 1768.0                                                            |
| Crystal size/mm <sup>3</sup>                | 0.15 × 0.12 × 0.11                                                |
| Radiation                                   | Cu Kα (λ = 1.54184)                                               |
| 2θ range for data collection/°              | 5.148 to 147.086                                                  |
| Index ranges                                | -11 ≤ h ≤ 15, -22 ≤ k ≤ 21, -25 ≤ l ≤ 27                          |
| Reflections collected                       | 70868                                                             |
| Independent reflections                     | 17881 [R <sub>int</sub> = 0.0472, R <sub>sigma</sub> = 0.0373]    |
| Data/restraints/parameters                  | 17881/0/993                                                       |
| Goodness-of-fit on F <sup>2</sup>           | 1.046                                                             |
| Final R indexes [I ≥ 2σ (I)]                | R <sub>1</sub> = 0.0444, wR <sub>2</sub> = 0.1191                 |
| Final R indexes [all data]                  | R <sub>1</sub> = 0.0540, wR <sub>2</sub> = 0.1250                 |
| Largest diff. peak/hole / e Å <sup>-3</sup> | 2.27/-0.79                                                        |

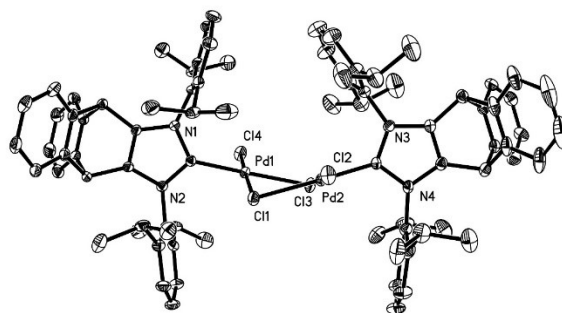

**Table S2. Crystal data and structure refinement for C4.**

| Identification code                         | C4                                                                             |
|---------------------------------------------|--------------------------------------------------------------------------------|
| Empirical formula                           | C <sub>82</sub> H <sub>88</sub> Cl <sub>4</sub> N <sub>4</sub> Pd <sub>2</sub> |
| Formula weight                              | 1484.16                                                                        |
| Temperature/K                               | 169.99(10)                                                                     |
| Crystal system                              | monoclinic                                                                     |
| Space group                                 | P2 <sub>1</sub> /c                                                             |
| a/Å                                         | 12.9002(4)                                                                     |
| b/Å                                         | 27.2207(10)                                                                    |
| c/Å                                         | 20.8068(7)                                                                     |
| α/°                                         | 90                                                                             |
| β/°                                         | 90.068(3)                                                                      |
| γ/°                                         | 90                                                                             |
| Volume/Å <sup>3</sup>                       | 7306.4(4)                                                                      |
| Z                                           | 4                                                                              |
| ρ <sub>calc</sub> /cm <sup>3</sup>          | 1.349                                                                          |
| μ/mm <sup>-1</sup>                          | 5.665                                                                          |
| F(000)                                      | 3072.0                                                                         |
| Crystal size/mm <sup>3</sup>                | 0.15 × 0.1 × 0.08                                                              |
| Radiation                                   | Cu Kα (λ = 1.54184)                                                            |
| 2θ range for data collection/°              | 5.346 to 147.736                                                               |
| Index ranges                                | -16 ≤ h ≤ 15, -33 ≤ k ≤ 32, -25 ≤ l ≤ 24                                       |
| Reflections collected                       | 42105                                                                          |
| Independent reflections                     | 14193 [R <sub>int</sub> = 0.1102, R <sub>sigma</sub> = 0.1261]                 |
| Data/restraints/parameters                  | 14193/0/845                                                                    |
| Goodness-of-fit on F <sup>2</sup>           | 1.028                                                                          |
| Final R indexes [I ≥ 2σ (I)]                | R <sub>1</sub> = 0.0699, wR <sub>2</sub> = 0.1575                              |
| Final R indexes [all data]                  | R <sub>1</sub> = 0.1117, wR <sub>2</sub> = 0.1778                              |
| Largest diff. peak/hole / e Å <sup>-3</sup> | 0.92/-0.95                                                                     |

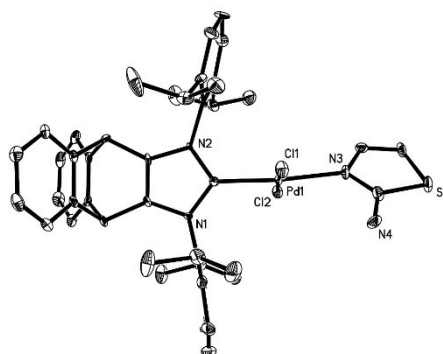

**Table S3. Crystal data and structure refinement for C5.**

| Identification code                         | C5                                                                 |
|---------------------------------------------|--------------------------------------------------------------------|
| Empirical formula                           | C <sub>45</sub> H <sub>50</sub> Cl <sub>4</sub> N <sub>4</sub> PdS |
| Formula weight                              | 927.15                                                             |
| Temperature/K                               | 169.99(10)                                                         |
| Crystal system                              | monoclinic                                                         |
| Space group                                 | P2 <sub>1</sub> /n                                                 |
| a/Å                                         | 13.0079(2)                                                         |
| b/Å                                         | 24.0698(3)                                                         |
| c/Å                                         | 13.9399(2)                                                         |
| α/°                                         | 90                                                                 |
| β/°                                         | 101.1780(10)                                                       |
| γ/°                                         | 90                                                                 |
| Volume/Å <sup>3</sup>                       | 4281.75(11)                                                        |
| Z                                           | 4                                                                  |
| ρ <sub>calc</sub> /g/cm <sup>3</sup>        | 1.438                                                              |
| μ/mm <sup>-1</sup>                          | 6.530                                                              |
| F(000)                                      | 1912.0                                                             |
| Crystal size/mm <sup>3</sup>                | 0.15 × 0.13 × 0.11                                                 |
| Radiation                                   | Cu Kα (λ = 1.54184)                                                |
| 2θ range for data collection/°              | 7.346 to 133.156                                                   |
| Index ranges                                | -12 ≤ h ≤ 15, -28 ≤ k ≤ 28, -16 ≤ l ≤ 16                           |
| Reflections collected                       | 32142                                                              |
| Independent reflections                     | 7580 [R <sub>int</sub> = 0.0571, R <sub>sigma</sub> = 0.0401]      |
| Data/restraints/parameters                  | 7580/0/512                                                         |
| Goodness-of-fit on F <sup>2</sup>           | 1.029                                                              |
| Final R indexes [I ≥ 2σ (I)]                | R <sub>1</sub> = 0.0469, wR <sub>2</sub> = 0.1193                  |
| Final R indexes [all data]                  | R <sub>1</sub> = 0.0502, wR <sub>2</sub> = 0.1227                  |
| Largest diff. peak/hole / e Å <sup>-3</sup> | 1.96/-0.97                                                         |

## 5. References

- 1 Y.-M. Guo, Y. Zhang, M.-J. Zhang, T. Li, J.-Y. Wu and F.-S. Liu, Heteroaryl–Heteroaryl Suzuki–Miyaura Cross-Coupling Enabled by Large-but-Flexible Dibenzobarrelene-Derived Pd-NHC Precatalysts, *Organometallics.*, 2023, **42**, 2028-2037.
